# Supplementary material for: Alignments of endocrine, anthropometric, and metabolic parameters in type 2 diabetes after intervention with an Okinawa-based Nordic diet
Source: PubMed Central journal article supplement (PMC5854836; doi:10.29219/fnr.v62.1328), 2018-03-14
Supplement: FNR-62-1328-s001.pdf [file FNR-62-1328-s001.pdf]

**Supplementary Table 1.** Nutrition composition of the Okinawan-based Nordic diet

| <b>Nutritional value</b>            | <b>Unit</b> | <b>Calculated value</b> | <b>E%</b> | <b>Recommended (NNR 2012)</b> |
|-------------------------------------|-------------|-------------------------|-----------|-------------------------------|
| <i>Total Energy</i>                 | kcal        | 1866                    |           |                               |
| <i>Energy (excluding beverages)</i> | kcal        | 1629                    |           |                               |
| <i>Protein</i>                      | g           | 95.0                    | 23        | 10–20 E%                      |
| <i>Fat</i>                          | g           | 63.9                    | 35        | 25–40 E%                      |
| <i>Saturated fatty acids</i>        | g           | 18.7                    | 10        | <10 E%                        |
| <i>Polyunsaturated fatty acids</i>  | g           | 14.9                    | 8         | 5–10 E%                       |
| <i>Mono-unsaturated fatty acids</i> | g           | 17.8                    | 10        | 10–20 E%                      |
| <i>Carbohydrate</i>                 | g           | 168.4                   | 42        | 45–60 E%                      |
| <i>Sucrose</i>                      | g           | 23.5                    | 6         | <10 E%                        |
| <i>Dietary fibre</i>                | g           | 35.9                    |           | 25–35 g                       |

E% = Energy percentage. Daily mean intake of energy, nutrients, and food components of the modified Okinawan-based Nordic diet, compared with Nordic Nutrition Recommendations (NNR) 2012 (ref No 18).

**Supplementary Table 2.** Inter-assay coefficient of variation (cv) for controls in Luminex analyses

| Diabetic biomarker | Low control    | High control   | Intra-assay cv*<br>% |
|--------------------|----------------|----------------|----------------------|
|                    | inter-assay cv | inter-assay cv |                      |
|                    | % (n)          | % (n)          |                      |
| C-peptide          | 17.0 (7)       | 4.9 (7)        | 5                    |
| Ghrelin            | 18.0 (8)       | 12.2 (8)       | 4                    |
| Glucagon           | 16.4 (8)       | 13.5 (8)       | 8                    |
| GLP-1              | 10.5 (8)       | 13.9 (8)       | 8                    |
| GIP                | 8.3 (8)        | 9.9 (8)        | 3                    |
| Insulin            | 9.0 (8)        | 8.2 (8)        | 3                    |
| Leptin             | 8.7 (8)        | 6.7 (8)        | 3                    |
| PAI-1              | 7.4 (5)        | 12.8 (4)       | 5                    |
| Resistin           | 4.3 (8)        | 10.5 (8)       | 3                    |
| Visfatin           | 29.0 (8)       | 15.5 (8)       | 4                    |

\*= Intra-assay coefficient of variation (cv) % is according to Bio-Rad Laboratories. n = number of samples. GLP-1 = Glucagon-like peptide-1, GIP = Glucose-dependent insulinotropic polypeptide, PAI-1 = plasminogen-activator inhibitor-1.

Supplemental Figure 1. Flow-chart of patient recruitment and study design. Two patients interrupted the study at 6 weeks on diet, and data collected at that time point was calculated together with data from patients with 12 weeks of intervention.

Recruitment of patients with type 2 diabetes at a primary health care center

*Inclusion criteria:*

Age span: 18–70 years  
Both parents born in Scandinavia  
Type 2 diabetes

*Exclusion criteria:*

Inability to understand the Swedish language  
Severe food allergy  
Severe heart, pulmonary, cardiovascular, malignant or psychiatric diseases  
Severe liver disease (spontaneous prothrombin complex (INR) > 1.1)  
Severe renal disease (glomerular filtration rate (GFR) < 30 mL/min/1.73 m<sup>2</sup>)  
Pregnancy  
Already on ongoing weight-reducing diet  
Major prior gastrointestinal surgery  
Alcohol and/or drug abuse

45 available patients contacted by mail and phone

30 patients included at baseline  
*Anthropometry*  
*Blood sampling*  
*Study and nutrition questionnaires*  
*Study protocol*

30 patients examined at week 2 and 6 after dietary intervention  
*Anthropometry*  
*Study protocol*

28 patients examined at week 12 and 2 patients at week 6 after dietary intervention  
*Anthropometry*  
*Blood sampling*  
*Study and nutrition questionnaires*  
*Study protocol*

23 patients at 28-week follow-up  
*Anthropometry*  
*Blood sampling*  
*Study and nutrition questionnaires*  
*Study protocol*

15 patients excluded or unwilling to participate:

Unwillingness (n = 11)  
Late autoimmune diabetes in adult (n = 1)  
Gastric by-pass surgery (n = 1)  
Pregnancy (n = 1)  
Already on another diet (n = 1)

2 drop outs at week 6:

Work-related time constraints (n = 1)  
Family-related problems (n = 1)

5 drop outs at week 28:

Unwillingness to continue (n = 2)  
Depression (n = 2)  
Family-related problems (n = 1)
